# Supplementary material for: A Cell- and Tissue-Specific Weakness of the Protein Homeostasis System Underlies Brain Vulnerability to Protein Aggregation
Source: PubMed Central journal article supplement — iScience. 2020 Feb 24;23(3):100934. doi: 10.1016/j.isci.2020.100934 (PMC7063235; doi:10.1016/j.isci.2020.100934), 2020-02-24
Supplement: mmc1.pdf [file mmc1.pdf]

iScience, Volume 23

## **Supplemental Information**

### **A Cell- and Tissue-Specific Weakness of the Protein Homeostasis System Underlies Brain Vulnerability to Protein Aggregation**

**Rishika Kundra, Christopher M. Dobson, and Michele Vendruscolo**

# Supporting Information

## Transparent Methods

### Dataset Acquisition

**Healthy brain tissues.** Microarray data for healthy brain tissues were acquired from the Allen Brain Atlas (Hawrylycz et al., 2012). Gene expression data for 6 healthy human brains were available, across 900 different tissues. Data were scaled and normalised using the ‘scale’ function of the Weighted Gene Correlation Network (WGCNA) package (Langfelder and Horvath, 2008). As the Allen Brain Atlas uses multiple probes for each genes, the ‘collapseRows’ function of WGCNA package was used to get a single expression value for each gene across all samples. The expression values for each gene was then averaged across all six brains to arrive at the final expression value associated with each gene (Kundra et al., 2017).

**Tissue specific data.** We obtained tissue specific data across various human tissues from a previously published dataset (Su et al., 2004). Certain cancerous tissues and cell lines were removed from the analysis as our aim was to study the expression levels in a healthy state, leaving 77 tissues for the study (**Table S1**). From these, 27 were characterised as neural tissues and 50 body tissues (**Table S1**). For the Braak and Non-Braak analysis, brain regions (from the 27 brain tissues) were assigned to either Braak or Non-Braak (Freer et al., 2016). Briefly, brain regions in the Allen Brain Atlas were matched with the closest regions mentioned in the original paper (Braak and Braak, 1991). 7 tissues were found to correspond to different Braak stages (**Table S1**)

**Cell type specific data.** Single-cell RNAseq data for 4 different cell types found in the brain were obtained from a published dataset (Darmanis et al., 2015). Data were scaled and normalised in R.

### Coexpression network construction

We used the data obtained from the Allen Brain Atlas to construct a coexpression network for the genes corresponding to the metastable subproteome associated with Alzheimer’s disease (MS) (Kundra et al., 2017) and the genes associated with the protein homeostasis system to get the protein

homeostasis complement (PHC) of the MS. WGCNA was used to construct the coexpression network (Kundra et al., 2017). Briefly, WGCNA is a clustering algorithm based on hierarchical clustering but which uses ‘soft thresholding’ and the concept of topological overlap or shared neighbours to identify clusters of coexpressed genes. The soft thresholding method assigns a weight to each pair of interacting genes and uses such weight along with the topological overlap to identify modules of coexpressed genes in the expression data.

### **Calculation of the protection factor $s$**

Since our aim was to study the balance between the expression level of aggregation prone proteins and components associated with their regulation, we defined a protection factor,  $s$ , as the slope of the best-fit line for the relative expression of the MS and its PHC across different tissue or cell types. A line was fitted based on linear regression between the expression of MS and the PHC. The protection factor is a measure of the strength of the balance between the MS and its PHC.

### **Statistical testing**

To evaluate the significance of our results, we used random sets of genes corresponding in number to the MS and PHC and calculated the  $s$  for them. We then calculated the difference in  $s$  between the body and brain tissues ( $\Delta s$ ). We repeated these 1000 times to have a frequency distribution of  $\Delta s$  values for random sets of genes. The  $\Delta s$  for our genes of interest is 0.25, which is more than two SD away from the random sets of genes (**Figure S1**). Thus, our  $s$  values are highly robust and significant. The statistical testing was performed using the Scipy module in Python. The comparison of different ‘ $s$ ’ values was done using a two-tailed t test with a value of  $\alpha$  of 0.001.

| <b>Tissue</b>              | <b>Classification (1)</b> | <b>Classification (2)</b> |
|----------------------------|---------------------------|---------------------------|
| Adipocyte                  | Body                      | -                         |
| Adrenal cortex             | Body                      | -                         |
| Adrenal gland              | Body                      | -                         |
| Appendix                   | Body                      | -                         |
| Atrioventricular Node      | Body                      | -                         |
| BDCA4+DentriticCells       | Body                      | -                         |
| Bone marrow                | Body                      | -                         |
| Bronchial Epithelial Cells | Body                      | -                         |
| CD105+_Endothelial         | Body                      | -                         |
| CD14+_Monocytes            | Body                      | -                         |
| CD19+_BCells(neg._sel.)    | Body                      | -                         |
| CD33+_Myeloid              | Body                      | -                         |
| CD34+                      | Body                      | -                         |
| CD4+_Tcells                | Body                      | -                         |
| CD56+_NKCells              | Body                      | -                         |
| CD71+_EarlyErythroid       | Body                      | -                         |
| CD8+_Tcells                | Body                      | -                         |
| Cardiac Myocytes           | Body                      | -                         |
| Fetal Thyroid              | Body                      | -                         |
| Fetal liver                | Body                      | -                         |
| Fetal lung                 | Body                      | -                         |
| Heart                      | Body                      | -                         |
| Kidney                     | Body                      | -                         |
| Liver                      | Body                      | -                         |
| Lung                       | Body                      | -                         |
| Lymphnode                  | Body                      | -                         |
| Ovary                      | Body                      | -                         |
| Pancreas                   | Body                      | -                         |
| Pancreatic Islet           | Body                      | -                         |
| Placenta                   | Body                      | -                         |
| Prostate                   | Body                      | -                         |
| Salivary gland             | Body                      | -                         |
| Skeletal muscle            | Body                      | -                         |
| Skin                       | Body                      | -                         |
| Smooth muscle              | Body                      | -                         |
| Testis                     | Body                      | -                         |
| Testis Germ Cell           | Body                      | -                         |
| Testis Intersitial         | Body                      | -                         |
| Testis Leydig Cell         | Body                      | -                         |
| Testis Seminiferous Tubule | Body                      | -                         |
| Thymus                     | Body                      | -                         |
| Thyroid                    | Body                      | -                         |
| Tongue                     | Body                      | -                         |
| Tonsil                     | Body                      | -                         |

|                            |       |           |
|----------------------------|-------|-----------|
| Trachea                    | Body  | -         |
| Uterus                     | Body  | -         |
| Uterus Corpus              | Body  | -         |
| Whole Blood                | Body  | -         |
| colon                      | Body  | -         |
| Small intestine            | Body  | -         |
| Amygdala                   | Brain | Braak     |
| Caudate nucleus            | Brain | Non Braak |
| Cerebellum                 | Brain | Non Braak |
| Cerebellum peduncles       | Brain | Non Braak |
| Ciliary ganglion           | Brain | Non Braak |
| Cingulate cortex           | Brain | Braak     |
| Dorsal root ganglion       | Brain | Non Braak |
| Fetal brain                | Brain | Non Braak |
| Globus pallidus            | Brain | Non Braak |
| Hypothalamus               | Brain | Braak     |
| Medulla oblongata          | Brain | Non Braak |
| Occipital lobe             | Brain | Braak     |
| Olfactory bulb             | Brain | Non Braak |
| Parietal lobe              | Brain | Non Braak |
| Pons                       | Brain | Non Braak |
| Prefrontal cortex          | Brain | Braak     |
| Spinalcord                 | Brain | Non Braak |
| Subthalamic nucleus        | Brain | Non Braak |
| Superior cervical ganglion | Brain | Non Braak |
| Temporal lobe              | Brain | Braak     |
| Thalamus                   | Brain | Braak     |
| Trigeminal ganglion        | Brain | Non Braak |
| Whole brain                | Brain | Non Braak |
| Pineal day                 | Brain | Non Braak |
| Pineal night               | Brain | Non Braak |
| Pituitary                  | Brain | Non Braak |
| retina                     | Brain | Non Braak |

**Table S1. List of the 77 different tissues used in the analysis. The Braak classification (Braak and Braak, 1991) is reported for brain tissues, related to Figure 1.**

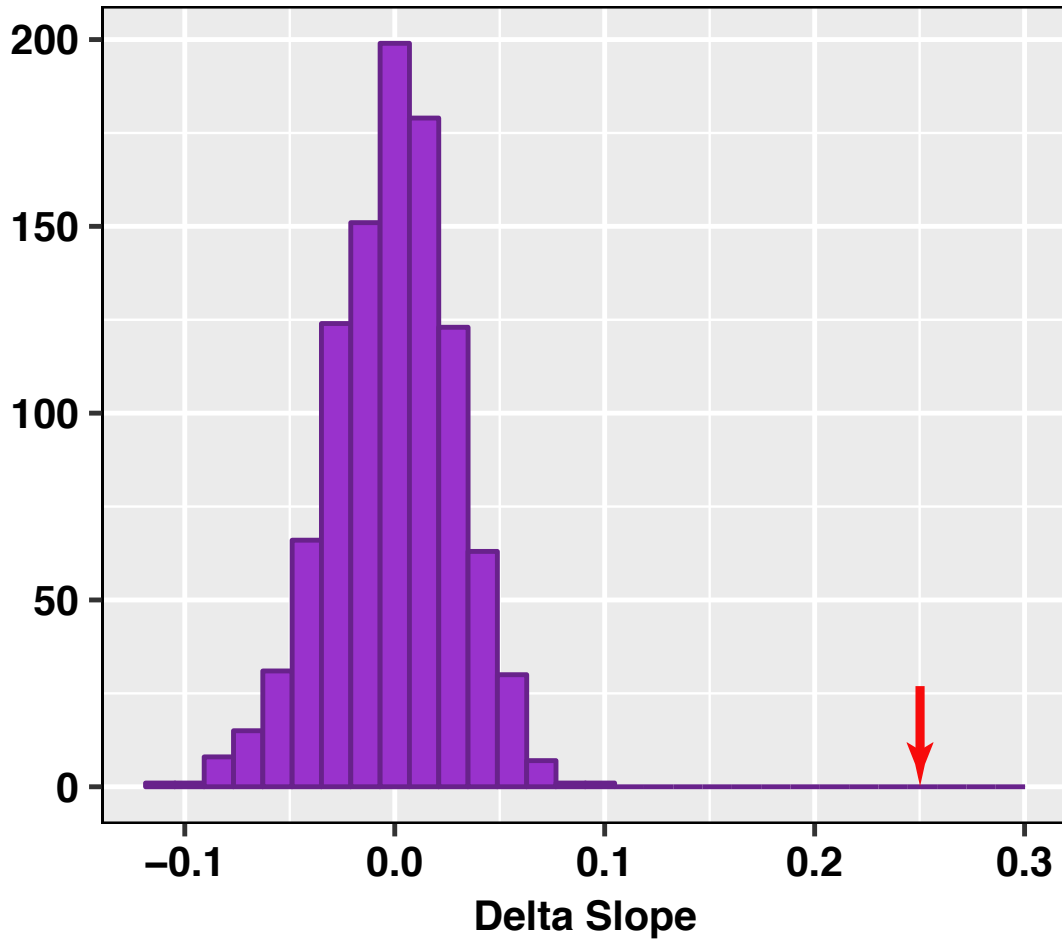

**Figure S1.** Histogram showing  $\Delta s$  (difference in  $s$  for body tissues and brain tissues) for 1000 random sets of genes, related to Figure 1. The  $\Delta s$  for our genes of interest (genes that are supersaturated and downregulated only in Alzheimer’s disease, and the associated PHC) is 0.25 (shown by red arrow).

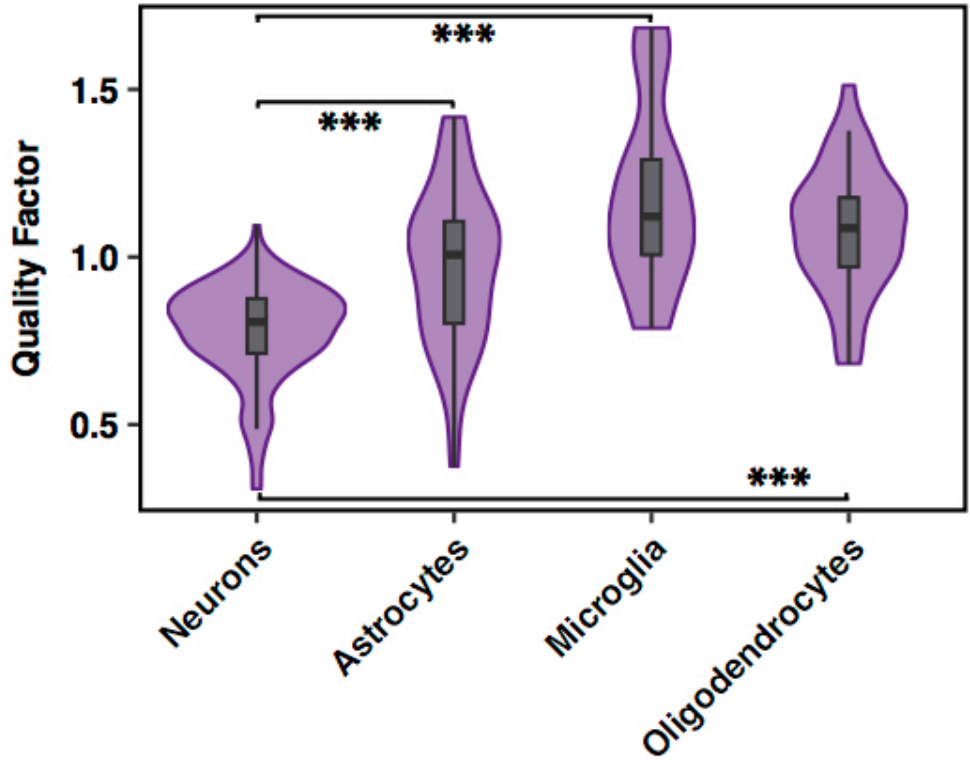

Figure S2. Neurons have a lower value of protection factor  $s$  compared to other non-neuronal cell types, related to Figure 3. \*\*\*  $p < 0.001$ , see Methods.
